# Supplementary material
Source: PubMed Central journal article supplement (PMC2949533)
Supplement: NIHMS235351-supplement-01.pdf [file NIHMS235351-supplement-01.pdf]

## Supplemental Information

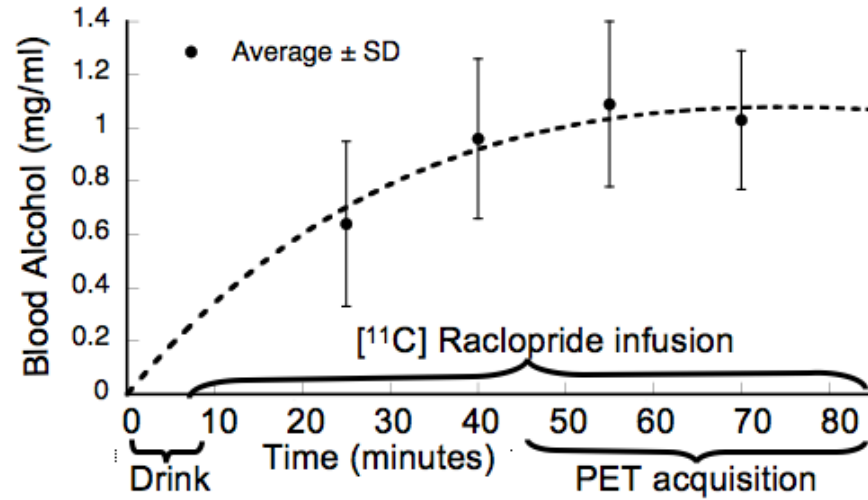

**Figure S1.** Average blood-alcohol level across all  $n = 21$  subjects superposed on a schematic view of the study design. Filled circles are the measured means at each time point. Error bars are standard deviations across subjects. Dashed line is a curve fit to the formula  $A t \exp(-bt)$  with fitted parameters  $A$  and  $b$ .

**Table S1.** Alcohol volume and concentration by sex. For the group as a whole, alcohol concentration in drink correlated positively with DA release in VST ( $r=0.45$ ,  $p=0.02$ ), but not when separated by sex.

|                | Men ( $n = 11$ )  | Women ( $n = 10$ ) | T-test ( $p$ ) |
|----------------|-------------------|--------------------|----------------|
| Alcohol volume | $184.5 \pm 17$ ml | $115.4 \pm 7.1$ ml | $< 0.0001$     |
| v/v% alcohol   | $58.9 \pm 8.8\%$  | $49.3 \pm 4.5\%$   | $< 0.0001$     |

**Table S2.** Subjective measures. Mean total scores of subjective experience of activation and standard deviation obtained with the Biphasic Alcohol Experience Scale (BAES) at baseline (0 min), 30, 60, and 90 min (not corrected to baseline). Also shown is the average score across 90 minutes. The maximum total score at each time point is 70. Presented are scores for each drink condition, separated by sex, and for the group as a whole. Statistical significance of score difference between conditions was evaluated with paired, respectively two-group t-tests. P values for significant differences are in bold.

| BAES Subjective Activation (total scores) |                |                |             |                |                |             |                |                |             |
|-------------------------------------------|----------------|----------------|-------------|----------------|----------------|-------------|----------------|----------------|-------------|
|                                           | Men            |                |             | Women          |                |             | Total group    |                |             |
| Time point                                | <i>placebo</i> | <i>alcohol</i> | p (M)       | <i>placebo</i> | <i>alcohol</i> | p (W)       | <i>placebo</i> | <i>alcohol</i> | p (total)   |
| <b>0 min</b>                              | 34.2 ± 13.0    | 38.0 ± 9.7     | 0.18        | 28.3 ± 15.7    | 24.9 ± 13.2    | 0.46        | 31.6 ± 14.2    | 32.1 ± 12.9    | 0.99        |
| <b>30 min</b>                             | 31.3 ± 12.2    | 39.3 ± 8.0     | <b>0.05</b> | 21.0 ± 11.6    | 29.6 ± 16.1    | 0.20        | 26.7 ± 12.8    | 34.9 ± 12.9    | <b>0.02</b> |
| <b>60 min</b>                             | 30.2 ± 11.9    | 36.8 ± 10.4    | 0.15        | 18.8 ± 9.4     | 30.3 ± 13.2    | <b>0.04</b> | 25.1 ± 12.1    | 33.9 ± 11.9    | <b>0.01</b> |
| <b>90 min</b>                             | 29.5 ± 13.1    | 35.9 ± 10.2    | 0.16        | 22.8 ± 12.3    | 30.0 ± 12.9    | 0.20        | 26.5 ± 12.9    | 33.3 ± 11.6    | <b>0.05</b> |
| <b>Average</b>                            | 30.3 ± 12.0    | 37.3 ± 9.1     | 0.10        | 20.9 ± 12.3    | 30.0 ± 13.5    | 0.09        | 26.1 ± 12.0    | 34.0 ± 11.6    | <b>0.01</b> |
